# Supplementary material
Source: PubMed Central journal article supplement (PMC7665999)
Supplement: NIHMS1619946-supplement-Supplemental_Data_File_3___doc___tif__pdf__etc__.pdf [file NIHMS1619946-supplement-Supplemental_Data_File_3___doc___tif__pdf__etc__.pdf]

**Supplemental Table 1: Odds Ratios (ORs) and 95% Confidence Intervals (CIs) for associations between history of cancer (excluding non-melanoma skin cancer) with odds of trust and access of medical records.**

| <b>Outcome</b>                                                      | <b>Cancer Survivors<sup>a</sup><br/>(N = 436)<br/>N (%)<sup>d</sup></b> | <b>No Cancer History<br/>(N = 2898)<br/>N (%)<sup>d</sup></b> | <b>Model 1<sup>b</sup><br/>OR (95% CI)</b> | <b>Model 2<sup>c</sup><br/>OR (95% CI)</b> |
|---------------------------------------------------------------------|-------------------------------------------------------------------------|---------------------------------------------------------------|--------------------------------------------|--------------------------------------------|
| <b>Provider Maintains Computerized Medical Record</b>               |                                                                         |                                                               |                                            |                                            |
| Yes                                                                 | 372 (90.65)                                                             | 2288 (76.17)                                                  | <b>2.96 (1.62 – 5.44)</b>                  | <b>2.63 (1.37 – 5.05)</b>                  |
| No/Don't Know                                                       | 55 (9.35)                                                               | 583 (23.83)                                                   | -                                          | -                                          |
| <b>Confident in Medical Record Safe Guards</b>                      |                                                                         |                                                               |                                            |                                            |
| Very                                                                | 181 (47.67)                                                             | 896 (31.54)                                                   | <b>1.85 (1.30 – 2.65)</b>                  | <b>1.79 (1.20 – 2.67)</b>                  |
| Somewhat & Not                                                      | 246 (52.34)                                                             | 1970 (68.46)                                                  | -                                          | -                                          |
| <b>Withheld Info due to Privacy Concerns about Medical Record</b>   |                                                                         |                                                               |                                            |                                            |
| Yes                                                                 | 25 (9.89)                                                               | 264 (9.08)                                                    | 1.45 (0.60 – 3.48)                         | 1.90 (0.77 – 4.70)                         |
| No/Don't Know                                                       | 402 (90.11)                                                             | 2601 (90.92)                                                  | -                                          | -                                          |
| <b>Ever Offered Online Records</b>                                  |                                                                         |                                                               |                                            |                                            |
| Yes                                                                 | 255 (62.00)                                                             | 1510 (49.86)                                                  | <b>1.80 (1.26 – 2.56)</b>                  | <b>1.57 (1.09 – 2.26)</b>                  |
| No/Don't Know                                                       | 179 (38.01)                                                             | 1375 (50.13)                                                  | -                                          | -                                          |
| <b>Offered Online Medical Record Access by Health Care Provider</b> |                                                                         |                                                               |                                            |                                            |
| Selected                                                            | 233 (98.19)                                                             | 1416 (94.04)                                                  | 3.03 (0.77 – 11.94)                        | <b>4.06 (1.21 – 13.71)</b>                 |
| Not Selected                                                        | 11 (1.81)                                                               | 62 (5.96)                                                     | -                                          | -                                          |
| <b>Offered Online Medical Record Access by Insurer</b>              |                                                                         |                                                               |                                            |                                            |
| Selected                                                            | 41 (16.57)                                                              | 319 (22.58)                                                   | 0.84 (0.43 – 1.64)                         | 0.75 (0.36 – 1.56)                         |
| Not Selected                                                        | 203 (83.43)                                                             | 1159 (77.42)                                                  | -                                          | -                                          |

<sup>a</sup> Non-melanoma skin cancer excluded

<sup>b</sup> Model adjusted for age

<sup>c</sup> Model adjusted for age, race, and gender.

<sup>d</sup> Presented as column total and weighted percentage

( - ) Represents referent outcome. No cancer history group is referent for odds ratio exposure.

Sub-groups may not sum to total respondents due to missing or invalid responses.

**Supplemental Table 2: Odds Ratios (ORs) and 95% Confidence Intervals (CIs) for associations between history of cancer, excluding non-melanoma skin cancer, with online medical record utilization among respondents ever offered online medical record access (n=1765)**

|                                                        | Cancer Survivors <sup>a</sup><br>(N = 255) | No Cancer History<br>(N = 1510) | Model 1 <sup>b</sup> | Model 2 <sup>c</sup> |
|--------------------------------------------------------|--------------------------------------------|---------------------------------|----------------------|----------------------|
| Outcome                                                | N (%) <sup>c</sup>                         | N (%) <sup>d</sup>              | OR (95% CI)          | OR (95% CI)          |
| <b>Online Medical Records Access and Use Frequency</b> |                                            |                                 |                      |                      |
| <b>Frequency of Use in Last 12 Months</b>              |                                            |                                 |                      |                      |
| ≥ 1                                                    | 144 (59.10)                                | 905 (58.53)                     | 1.19 (0.65 – 2.21)   | 1.13 (0.60 – 2.12)   |
| None                                                   | 103 (40.90)                                | 587 (41.47)                     | -                    | -                    |
| <b>Reasons for Not Using Online Medical Record</b>     |                                            |                                 |                      |                      |
| <b>Prefer to Speak Directly to Provider</b>            |                                            |                                 |                      |                      |
| Yes                                                    | 83 (86.77)                                 | 431 (71.04)                     | 2.22 (0.87 – 5.69)   | 2.54 (0.99 – 6.51)   |
| No                                                     | 14 (13.23)                                 | 132 (28.96)                     | -                    | -                    |
| <b>No online Access</b>                                |                                            |                                 |                      |                      |
| Yes                                                    | 14 (8.70)                                  | 71 (9.34)                       | 0.64 (0.25 – 1.66)   | 0.65 (0.23 – 1.85)   |
| No                                                     | 81 (91.30)                                 | 491 (90.66)                     | -                    | -                    |
| <b>No need</b>                                         |                                            |                                 |                      |                      |
| Yes                                                    | 57 (72.20)                                 | 345 (64.76)                     | 1.28 (0.55 – 3.01)   | 1.27 (0.52 – 3.12)   |
| No                                                     | 38 (27.80)                                 | 218 (35.24)                     | -                    | -                    |
| <b>Concerned about Privacy</b>                         |                                            |                                 |                      |                      |
| Yes                                                    | 16 (14.53)                                 | 91 (12.22)                      | 1.01 (0.38 – 2.71)   | 1.09 (0.39 – 3.10)   |
| No                                                     | 78 (85.47)                                 | 469 (77.12)                     | -                    | -                    |
| <b>Reason Online Medical Record Was Utilized</b>       |                                            |                                 |                      |                      |
| <b>Medication Refill</b>                               |                                            |                                 |                      |                      |
| Selected                                               | 66 (42.24)                                 | 357 (38.49)                     | 0.99 (0.57 – 1.75)   | 1.02 (0.58 – 1.79)   |
| Not Selected                                           | 81 (57.76)                                 | 534 (61.51)                     | -                    | -                    |
| <b>Paperwork</b>                                       |                                            |                                 |                      |                      |
| Selected                                               | 59 (42.63)                                 | 356 (43.63)                     | 1.09 (0.64 – 1.88)   | 1.16 (0.69 – 1.96)   |
| Not Selected                                           | 89 (57.37)                                 | 531 (56.37)                     | -                    | -                    |
| <b>To Request Correction</b>                           |                                            |                                 |                      |                      |
| Yes                                                    | 14 (9.55)                                  | 60 (6.24)                       | 1.40 (0.40 – 4.84)   | 1.42 (0.42 – 4.70)   |
| No                                                     | 133 (90.45)                                | 826 (93.76)                     | -                    | -                    |
| <b>Messaging HCP</b>                                   |                                            |                                 |                      |                      |
| Yes                                                    | 73 (43.61)                                 | 438 (52.97)                     | 0.67 (0.39 – 1.15)   | 0.73 (0.43 – 1.26)   |
| No                                                     | 76 (56.39)                                 | 451 (47.03)                     | -                    | -                    |
| <b>Downloading Records</b>                             |                                            |                                 |                      |                      |
| Yes                                                    | 40 (27.53)                                 | 240 (25.50)                     | 1.15 (0.62 – 2.14)   | 1.28 (0.70 – 2.33)   |
| No                                                     | 108 (72.47)                                | 652 (74.50)                     | -                    | -                    |
| <b>Adding Info</b>                                     |                                            |                                 |                      |                      |
| Yes                                                    | 43 (28.55)                                 | 210 (23.01)                     | 1.47 (0.86 – 2.52)   | 1.45 (0.83 – 2.55)   |

|                                      |             |             |                    |                    |
|--------------------------------------|-------------|-------------|--------------------|--------------------|
| No                                   | 105 (71.45) | 678 (76.99) | -                  | -                  |
| <b>Making Decision</b>               |             |             |                    |                    |
| Yes                                  | 43 (30.48)  | 219 (23.52) | 1.55 (0.88 – 2.72) | 1.62 (0.92 – 2.84) |
| No                                   | 106 (69.52) | 670 (76.48) | -                  | -                  |
| <b>Usefulness</b>                    |             |             |                    |                    |
| <b>How Useful is Medical Record?</b> |             |             |                    |                    |
| Very & Somewhat                      | 122 (84.17) | 735 (82.76) | 1.23 (0.38 – 3.98) | 1.15 (0.36 – 3.72) |
| Not Very/Not At All/Don't Use        | 23 (15.83)  | 149 (17.24) | -                  | -                  |

<sup>a</sup> Excluding non-melanoma skin cancer

<sup>b</sup> Model adjusted for age

<sup>c</sup> Model adjusted for age, race, and gender

<sup>d</sup> Presented as column total and weighted percentage

( - ) Represents referent outcome. No cancer history group is referent for odds ratio exposure.

Sub-groups may not sum to total respondents due to missing or invalid responses.

**Supplemental Table 3: Odds Ratios (ORs) and 95% Confidence Intervals (CIs) for associations between history of cancer with odds of trust and access of medical records, stratified by gender.**

| Outcome                                                             | Among Women<br>(N=1,911)         |                                     |                           | Among Men<br>(N=1,310)        |                                     |                             |
|---------------------------------------------------------------------|----------------------------------|-------------------------------------|---------------------------|-------------------------------|-------------------------------------|-----------------------------|
|                                                                     | Cancer<br>Survivors<br>(N = 315) | No Cancer<br>History<br>(N = 1,596) | Model 1 <sup>a</sup>      | Cancer Survivors<br>(N = 219) | No Cancer<br>History<br>(N = 1,091) | Model 1 <sup>a</sup>        |
|                                                                     | N (%) <sup>b</sup>               | N (%) <sup>b</sup>                  | OR (95% CI)               | N (%) <sup>b</sup>            | N (%) <sup>b</sup>                  | OR (95% CI)                 |
| <b>Provider Maintains Computerized Medical Record</b>               |                                  |                                     |                           |                               |                                     |                             |
| Yes                                                                 | 279 (90.58)                      | 1,291 (81.66)                       | 1.77 (0.79 – 3.95)        | 188 (88.38)                   | 842 (70.97)                         | <b>2.29 (1.19 – 4.41)</b>   |
| No/Don't Know                                                       | 33 (9.42)                        | 294 (18.34)                         | -                         | 27 (11.62)                    | 238 (29.03)                         | -                           |
| <b>Confident in Medical Record Safe Guards</b>                      |                                  |                                     |                           |                               |                                     |                             |
| Very                                                                | 118 (44.21)                      | 512 (34.85)                         | 1.30 (0.80 – 2.11)        | 88 (41.17)                    | 321 (28.56)                         | <b>1.65 (1.13 – 2.40)</b>   |
| Somewhat & Not                                                      | 194 (55.79)                      | 1,358 (65.15)                       | -                         | 127 (58.83)                   | 738 (71.44)                         | -                           |
| <b>Withheld Info due to Privacy Concerns about Medical Record</b>   |                                  |                                     |                           |                               |                                     |                             |
| Yes                                                                 | 18 (9.46)                        | 140 (8.38)                          | 1.76 (0.58 – 5.36)        | 13 (8.61)                     | 101 (9.53)                          | 1.57 (0.44 – 5.57)          |
| No/Don't Know                                                       | 294 (90.54)                      | 1,444 (91.62)                       | -                         | 202 (91.39)                   | 978 (90.47)                         | -                           |
| <b>Ever Offered Online Records</b>                                  |                                  |                                     |                           |                               |                                     |                             |
| Yes                                                                 | 195 (65.88)                      | 884 (54.22)                         | <b>1.61 (1.19 – 2.19)</b> | 127 (55.15)                   | 527 (45.93)                         | 1.24 (0.71 – 2.17)          |
| No/Don't Know                                                       | 108 (34.12)                      | 705 (45.78)                         | -                         | 92 (44.85)                    | 560 (54.07)                         | -                           |
| <b>Offered Online Medical Record Access by Health Care Provider</b> |                                  |                                     |                           |                               |                                     |                             |
| Selected                                                            | 184 (99.06)                      | 842 (96.51)                         | 3.08 (0.64 – 14.80)       | 119 (97.98)                   | 484 (90.64)                         | <b>10.96 (1.77 – 67.75)</b> |
| Not Selected                                                        | 6 (0.94)                         | 27 (3.49)                           | -                         | 4 (2.02)                      | 31 (9.36)                           | -                           |
| <b>Offered Online Medical Record Access by Insurer</b>              |                                  |                                     |                           |                               |                                     |                             |
| Selected                                                            | 32(16.39)                        | 186 (20.54)                         | 0.84 (0.37 – 1.91)        | 17 (10.52)                    | 111 (25.79)                         | 0.42 (0.22 – 0.78)          |
| Not Selected                                                        | 158 (83.61)                      | 683 (79.46)                         | -                         | 106 (89.48)                   | 404 (74.21)                         | -                           |

<sup>a</sup> Model adjusted for age and race.

<sup>b</sup> Presented as column total and weighted percentage

( - ) Represents referent outcome. No cancer history group is referent for odds ratio exposure.

**Supplemental Table 4: Odds Ratios (ORs) and 95% Confidence Intervals (CIs) for associations between history of cancer with online medical record utilization, stratified by gender.**

| Outcome                                               | Among Women<br>(N=1,911)      |                                  |                           | Among Men<br>(N=1,310)        |                                  |                      |
|-------------------------------------------------------|-------------------------------|----------------------------------|---------------------------|-------------------------------|----------------------------------|----------------------|
|                                                       | Cancer Survivors<br>(N = 315) | No Cancer History<br>(N = 1,596) | Model 1 <sup>a</sup>      | Cancer Survivors<br>(N = 219) | No Cancer History<br>(N = 1,091) | Model 1 <sup>a</sup> |
|                                                       | N (%) <sup>b</sup>            | N (%) <sup>b</sup>               | OR (95% CI)               | N (%) <sup>b</sup>            | N (%) <sup>b</sup>               | OR (95% CI)          |
| <b>Online Medical Record Access and Use Frequency</b> |                               |                                  |                           |                               |                                  |                      |
| <b>Frequency of Use in Last 12 Months</b>             |                               |                                  |                           |                               |                                  |                      |
| ≥ 1                                                   | 110 (61.39)                   | 546 (59.99)                      | 1.20 (0.60 – 2.43)        | 69 (53.42)                    | 305 (57.44)                      | 0.95 (0.50 – 1.81)   |
| No use                                                | 81 (38.61)                    | 331 (40.01)                      | -                         | 55 (46.58)                    | 214 (42.56)                      | -                    |
| <b>Reasons for Not Using Online Medical Record</b>    |                               |                                  |                           |                               |                                  |                      |
| <b>Prefer to Speak Directly to Provider</b>           |                               |                                  |                           |                               |                                  |                      |
| Yes                                                   | 62 (86.20)                    | 234 (73.86)                      | <b>2.36 (1.04 – 5.37)</b> | 46 (83.76)                    | 161 (64.53)                      | 1.77 (0.45 – 6.98)   |
| No                                                    | 11 (13.80)                    | 87 (26.14)                       | -                         | 8 (16.24)                     | 43 (35.47)                       | -                    |
| <b>No online Access</b>                               |                               |                                  |                           |                               |                                  |                      |
| Yes                                                   | 15 (16.12)                    | 45 (9.43)                        | 1.42 (0.50 – 4.05)        | 7 (9.88)                      | 26 (10.56)                       | 0.58 (0.13 – 2.60)   |
| No                                                    | 56 (83.88)                    | 275 (90.57)                      | -                         | 47 (90.12)                    | 177 (89.44)                      | -                    |
| <b>No need</b>                                        |                               |                                  |                           |                               |                                  |                      |
| Yes                                                   | 40 (70.34)                    | 197 (61.87)                      | 1.29 (0.46 – 3.61)        | 31 (60.12)                    | 129 (68.32)                      | 0.78 (0.27 – 2.19)   |
| No                                                    | 33 (29.66)                    | 121 (38.13)                      | -                         | 22 (39.88)                    | 78 (31.68)                       | -                    |
| <b>Concerned about Privacy</b>                        |                               |                                  |                           |                               |                                  |                      |
| Yes                                                   | 14 (20.36)                    | 52 (13.13)                       | 1.59 (0.54 – 4.67)        | 5 (9.23)                      | 29 (13.05)                       | 0.66 (0.06 – 7.85)   |
| No                                                    | 58 (79.64)                    | 267 (86.87)                      | -                         | 48 (90.77)                    | 174 (86.95)                      | -                    |
| <b>Reason Online Medical Record Was Utilized</b>      |                               |                                  |                           |                               |                                  |                      |
| <b>Medication Refill</b>                              |                               |                                  |                           |                               |                                  |                      |
| Selected                                              | 46 (41.95)                    | 210 (38.96)                      | 1.23 (0.68 – 2.24)        | 30 (41.37)                    | 132 (39.90)                      | 0.67 (0.27 – 1.71)   |
| Not Selected                                          | 64 (58.05)                    | 320 (61.04)                      | -                         | 40 (58.63)                    | 176 (60.10)                      | -                    |
| <b>Paperwork</b>                                      |                               |                                  |                           |                               |                                  |                      |
| Selected                                              | 51 (48.83)                    | 225 (46.38)                      | 1.16 (0.57 – 2.17)        | 28 (45.28)                    | 113 (42.08)                      | 1.86 (0.83 – 4.16)   |
| Not Selected                                          | 60 (51.17)                    | 303 (53.62)                      | -                         | 43 (54.72)                    | 193 (57.92)                      | -                    |
| <b>To Request Correction</b>                          |                               |                                  |                           |                               |                                  |                      |
| Yes                                                   | 13 (14.71)                    | 42 (9.08)                        | 1.70 (0.57 – 5.05)        | 6 (3.71)                      | 12 (2.84)                        | 1.67 (0.47 – 5.91)   |
| No                                                    | 98 (85.29)                    | 485 (90.92)                      | -                         | 64 (96.29)                    | 295 (97.16)                      | -                    |
| <b>Messaging HCP</b>                                  |                               |                                  |                           |                               |                                  |                      |
| Yes                                                   | 59 (47.79)                    | 262 (50.84)                      | 0.86 (0.46 – 1.63)        | 31 (44.36)                    | 156 (57.64)                      | 0.64 (0.30 – 1.37)   |
| No                                                    | 53 (52.21)                    | 268 (49.16)                      | -                         | 40 (55.64)                    | 151 (42.36)                      | -                    |
| <b>Downloading Records</b>                            |                               |                                  |                           |                               |                                  |                      |
| Yes                                                   | 25 (19.56)                    | 136 (25.01)                      | 0.77 (0.36 – 1.64)        | 26 (34.63)                    | 88 (25.47)                       | 1.47 (0.68 – 3.20)   |
| No                                                    | 86 (80.44)                    | 395 (74.99)                      | -                         | 45 (65.37)                    | 220 (74.53)                      | -                    |

|                                      |            |             |                    |            |             |                           |
|--------------------------------------|------------|-------------|--------------------|------------|-------------|---------------------------|
| <b>Adding Info</b>                   |            |             |                    |            |             |                           |
| Yes                                  | 29 (22.76) | 131 (25.30) | 0.83 (0.37 – 1.87) | 25 (41.66) | 66 (20.12)  | <b>3.15 (1.32 – 7.49)</b> |
| No                                   | 83 (77.24) | 398 (74.70) | -                  | 45 (58.34) | 241 (79.88) | -                         |
| <b>Making Decision</b>               |            |             |                    |            |             |                           |
| Yes                                  | 27 (25.16) | 136 (26.16) | 1.13 (0.53 – 2.38) | 22 (33.84) | 72 (21.59)  | 1.67 (0.65 – 4.28)        |
| No                                   | 85 (74.84) | 394 (73.84) | -                  | 49 (66.16) | 235 (78.41) | -                         |
| <b>Usefulness</b>                    |            |             |                    |            |             |                           |
| <b>How Useful is Medical Record?</b> |            |             |                    |            |             |                           |
| Very & Somewhat                      | 85 (77.27) | 441 (83.68) | 0.76 (0.24 – 2.43) | 63 (84.37) | 250 (82.09) | 1.36 (0.33 – 5.62)        |
| Not Very/Not At All/Don't Use        | 25 (22.73) | 86 (16.32)  | -                  | 8 (15.63)  | 54 (17.91)  | -                         |

<sup>a</sup> Model adjusted for age and race.

<sup>b</sup> Presented as column total and weighted percentage

( - ) Represents referent outcome. No cancer history group is referent for odds ratio exposure.

**Supplemental Table 5: Odds ratios (ORs) and 95% confidence intervals (CIs) for associations between history of cancer with odds of trust and access of medical records, stratified by age (less than 65 years vs. 65 years and older).**

| Outcome                                                                | Less than 65 (years)<br>(N = 2,077)                 |                                                        |                                     | 65 and older (years)<br>(N = 1,152)                 |                                                      |                                     |
|------------------------------------------------------------------------|-----------------------------------------------------|--------------------------------------------------------|-------------------------------------|-----------------------------------------------------|------------------------------------------------------|-------------------------------------|
|                                                                        | Cancer Survivors<br>(N = 200)<br>N (%) <sup>b</sup> | No Cancer History<br>(N = 1,877)<br>N (%) <sup>b</sup> | Model 1 <sup>a</sup><br>OR (95% CI) | Cancer Survivors<br>(N = 334)<br>N (%) <sup>b</sup> | No Cancer History<br>(N = 818)<br>N (%) <sup>b</sup> | Model 1 <sup>a</sup><br>OR (95% CI) |
| <b>Provider Maintains Computerized Medical Record</b>                  |                                                     |                                                        |                                     |                                                     |                                                      |                                     |
| Yes                                                                    | 170 (88.31)                                         | 1,465 (74.79)                                          | 2.12 (1.00 – 4.50)                  | 298 (91.53)                                         | 677 (84.42)                                          | 1.83 (0.97 – 3.46)                  |
| No/Don't Know                                                          | 27 (11.69)                                          | 400 (25.21)                                            | -                                   | 33 (8.47)                                           | 132 (15.58)                                          | -                                   |
| <b>Confident in Safe Guards</b>                                        |                                                     |                                                        |                                     |                                                     |                                                      |                                     |
| Very                                                                   | 74 (43.30)                                          | 551 (30.75)                                            | 1.64 (0.94 – 2.88)                  | 132 (42.43)                                         | 286 (37.39)                                          | 1.23 (0.87 – 1.73)                  |
| Somewhat & Not                                                         | 123 (56.70)                                         | 1,313 (69.26)                                          | -                                   | 199 (57.57)                                         | 520 (62.61)                                          | -                                   |
| <b>Withheld Info due to Privacy Concerns</b>                           |                                                     |                                                        |                                     |                                                     |                                                      |                                     |
| Yes                                                                    | 15 (11.27)                                          | 210 (10.02)                                            | 1.52 (0.57 – 4.03)                  | 14 (5.89)                                           | 34 (3.07)                                            | 2.46 (0.96 – 6.32)                  |
| No/Don't Know                                                          | 182 (88.73)                                         | 1,655 (89.98)                                          | -                                   | 317 (94.12)                                         | 774 (96.93)                                          | -                                   |
| <b>Ever Offered Online Records</b>                                     |                                                     |                                                        |                                     |                                                     |                                                      |                                     |
| Yes                                                                    | 137 (67.79)                                         | 1,029 (50.67)                                          | <b>1.72 (1.00 – 2.96)</b>           | 186 (55.40)                                         | 390 (48.68)                                          | 1.15 (0.79 – 1.68)                  |
| No/Don't Know                                                          | 62 (32.21)                                          | 842 (49.33)                                            | -                                   | 147 (44.60)                                         | 424 (51.32)                                          | -                                   |
| <b>Offered Access to Online Medical Record by Health Care Provider</b> |                                                     |                                                        |                                     |                                                     |                                                      |                                     |
| Selected                                                               | 131 (98.66)                                         | 968 (93.44)                                            | <b>14.37 (1.73 – 116.16)</b>        | 131 (98.67)                                         | 968 (93.48)                                          | 2.49 (0.50 – 12.29)                 |
| Not Selected                                                           | 3 (1.34)                                            | 48 (6.56)                                              | -                                   | 3 (1.34)                                            | 48 (6.56)                                            | -                                   |
| <b>Offered Access to Online Medical Record by Insurer</b>              |                                                     |                                                        |                                     |                                                     |                                                      |                                     |
| Selected                                                               | 31 (22.03)                                          | 251 (24.42)                                            | 0.79 (0.40 – 1.58)                  | 21 (6.36)                                           | 50 (14.61)                                           | 0.40 (0.21 – 0.74)                  |
| Not Selected                                                           | 103 (77.97)                                         | 765 (75.58)                                            | -                                   | 161 (93.64)                                         | 326 (85.39)                                          | -                                   |

<sup>a</sup> Model adjusted for gender and race.

<sup>b</sup> Presented as column total and weighted percentage

( - ) Represents referent outcome. No cancer history group is referent for odds ratio exposure.

**Supplemental Table 6: Odds ratios (ORs) and 95% confidence intervals (CIs) for associations between history of cancer with online medical record utilization, stratified by age (less than 65 years vs. 65 years and older)**

| Outcome                                               | Less than 65 (years)<br>(N = 2,077)                 |                                                        |                                     | 65 and older (years)<br>(N = 1,152)                 |                                                      |                                     |
|-------------------------------------------------------|-----------------------------------------------------|--------------------------------------------------------|-------------------------------------|-----------------------------------------------------|------------------------------------------------------|-------------------------------------|
|                                                       | Cancer Survivors<br>(N = 200)<br>N (%) <sup>b</sup> | No Cancer History<br>(N = 1,877)<br>N (%) <sup>b</sup> | Model 1 <sup>a</sup><br>OR (95% CI) | Cancer Survivors<br>(N = 334)<br>N (%) <sup>b</sup> | No Cancer History<br>(N = 818)<br>N (%) <sup>b</sup> | Model 1 <sup>a</sup><br>OR (95% CI) |
| <b>Online Medical Record Access and Use Frequency</b> |                                                     |                                                        |                                     |                                                     |                                                      |                                     |
| <b>Frequency of Use in Last 12 Months</b>             |                                                     |                                                        |                                     |                                                     |                                                      |                                     |
| ≥ 1                                                   | 85 (63.97)                                          | 653 (60.65)                                            | 1.11 (0.51 – 2.41)                  | 96 (52.77)                                          | 205 (48.78)                                          | 1.10 (0.66 – 1.83)                  |
| None                                                  | 49 (36.03)                                          | 368 (39.35)                                            | -                                   | 88 (47.23)                                          | 178 (51.22)                                          | -                                   |
| <b>Reasons for Not Using Online Medical Record</b>    |                                                     |                                                        |                                     |                                                     |                                                      |                                     |
| <b>Prefer to Speak Directly to Provider</b>           |                                                     |                                                        |                                     |                                                     |                                                      |                                     |
| Yes                                                   | 38 (87.58)                                          | 255 (66.40)                                            | <b>4.53 (1.18 – 17.44)</b>          | 72 (83.81)                                          | 141 (85.27)                                          | 0.88 (0.27 – 2.84)                  |
| No                                                    | 6 (12.42)                                           | 101 (33.60)                                            | -                                   | 12 (16.19)                                          | 28 (17.73)                                           | -                                   |
| <b>No online Access</b>                               |                                                     |                                                        |                                     |                                                     |                                                      |                                     |
| Yes                                                   | 4 (2.53)                                            | 26 (7.30)                                              | 0.42 (0.09 – 2.03)                  | 18 (23.18)                                          | 44 (20.12)                                           | 1.21 (0.47 – 3.09)                  |
| No                                                    | 40 (97.47)                                          | 331 (92.70)                                            | -                                   | 64 (76.82)                                          | 123 (79.88)                                          | -                                   |
| <b>No need</b>                                        |                                                     |                                                        |                                     |                                                     |                                                      |                                     |
| Yes                                                   | 25 (65.92)                                          | 229 (65.10)                                            | 0.99 (0.24 – 4.12)                  | 47 (65.62)                                          | 97 (64.71)                                           | 1.13 (0.51 – 2.49)                  |
| No                                                    | 19 (34.08)                                          | 127 (34.90)                                            | -                                   | 36 (34.38)                                          | 72 (35.29)                                           | -                                   |
| <b>Concerned about Privacy</b>                        |                                                     |                                                        |                                     |                                                     |                                                      |                                     |
| Yes                                                   | 8 (16.24)                                           | 50 (11.13)                                             | 1.86 (0.35 – 9.87)                  | 11 (14.30)                                          | 30 (19.98)                                           | 0.70 (0.20 – 2.50)                  |
| No                                                    | 36 (83.76)                                          | 305 (88.87)                                            | -                                   | 71 (85.70)                                          | 137 (80.02)                                          | -                                   |
| <b>Reason Online Medical Record Was Utilized</b>      |                                                     |                                                        |                                     |                                                     |                                                      |                                     |
| <b>Medication Refill</b>                              |                                                     |                                                        |                                     |                                                     |                                                      |                                     |
| Selected                                              | 37 (41.39)                                          | 244 (38.06)                                            | 1.25 (0.68 – 2.30)                  | 40 (42.21)                                          | 101 (49.53)                                          | 0.62 (0.32 – 1.21)                  |
| Not Selected                                          | 50 (58.61)                                          | 403 (61.94)                                            | -                                   | 53 (57.79)                                          | 97 (50.47)                                           | -                                   |
| <b>Paperwork</b>                                      |                                                     |                                                        |                                     |                                                     |                                                      |                                     |
| Selected                                              | 46 (54.79)                                          | 275 (45.64)                                            | 1.54 (0.74 – 3.23)                  | 32 (32.67)                                          | 64 (34.90)                                           | 0.96 (0.50 – 1.85)                  |
| Not Selected                                          | 41 (45.21)                                          | 370 (54.36)                                            | -                                   | 64 (67.33)                                          | 132 (65.10)                                          | -                                   |
| <b>To Request Correction</b>                          |                                                     |                                                        |                                     |                                                     |                                                      |                                     |
| Yes                                                   | 10 (12.03)                                          | 44 (5.71)                                              | 2.30 (0.69 – 7.67)                  | 9 (7.77)                                            | 12 (10.35)                                           | 0.89 (0.23 – 3.47)                  |
| No                                                    | 77 (87.97)                                          | 601 (94.29)                                            | -                                   | 84 (92.23)                                          | 184 (89.65)                                          | -                                   |
| <b>Messaging HCP</b>                                  |                                                     |                                                        |                                     |                                                     |                                                      |                                     |
| Yes                                                   | 41 (42.57)                                          | 317 (54.07)                                            | 0.71 (0.39 – 1.30)                  | 50 (49.99)                                          | 101 (50.73)                                          | 0.93 (0.49 – 1.75)                  |
| No                                                    | 46 (57.43)                                          | 330 (45.93)                                            | -                                   | 46 (50.01)                                          | 96 (49.27)                                           | -                                   |



|                                      |             |             |                    |            |             |                    |
|--------------------------------------|-------------|-------------|--------------------|------------|-------------|--------------------|
| <b>Downloading Records</b>           |             |             |                    |            |             |                    |
| Yes                                  | 21 (20.80)  | 181 (25.80) | 0.84 (0.41 – 1.74) | 29 (29.39) | 48 (22.23)  | 1.37 (0.72 – 2.62) |
| No                                   | 66 (79.20)  | 467 (74.20) | -                  | 67 (70.61) | 150 (77.77) | -                  |
| <b>Adding Info</b>                   |             |             |                    |            |             |                    |
| Yes                                  | 25 (29.33)  | 157 (23.42) | 1.24 (0.63 – 2.45) | 28 (28.22) | 43 (18.83)  | 1.71 (0.76- 3.88)  |
| No                                   | 62 (70.67)  | 489 (76.57) | -                  | 67 (71.78) | 154 (81.17) | -                  |
| <b>Making Decision</b>               |             |             |                    |            |             |                    |
| Yes                                  | 26 (28.36)  | 167 (24.91) | 1.27 (0.63 – 2.54) | 22 (25.80) | 42 (16.74)  | 1.50 (0.55 – 4.07) |
| No                                   | 61 (71.64)  | 480 (75.09) | -                  | 74 (74.20) | 155 (83.26) | -                  |
| <b>Usefulness</b>                    |             |             |                    |            |             |                    |
| <b>How Useful is Medical Record?</b> |             |             |                    |            |             |                    |
| Very & Somewhat                      | 71 (80.33)  | 538 (83.30) | 0.81 (0.28 – 2.37) | 79 (83.86) | 158 (79.46) | 1.25 (0.54 – 2.91) |
| Not Very/Not At All/Don't Use        | 156 (19.67) | 104 (16.70) | -                  | 17 (16.14) | 38 (20.54)  | -                  |

<sup>a</sup> Model adjusted for gender and race.

<sup>b</sup> Presented as column total and weighted percentage

( - ) Represents referent outcome. No cancer history group is referent for odds ratio exposure.
