# Supplementary material
Source: PubMed Central journal article supplement (PMC7665999)

## Cohort Schema

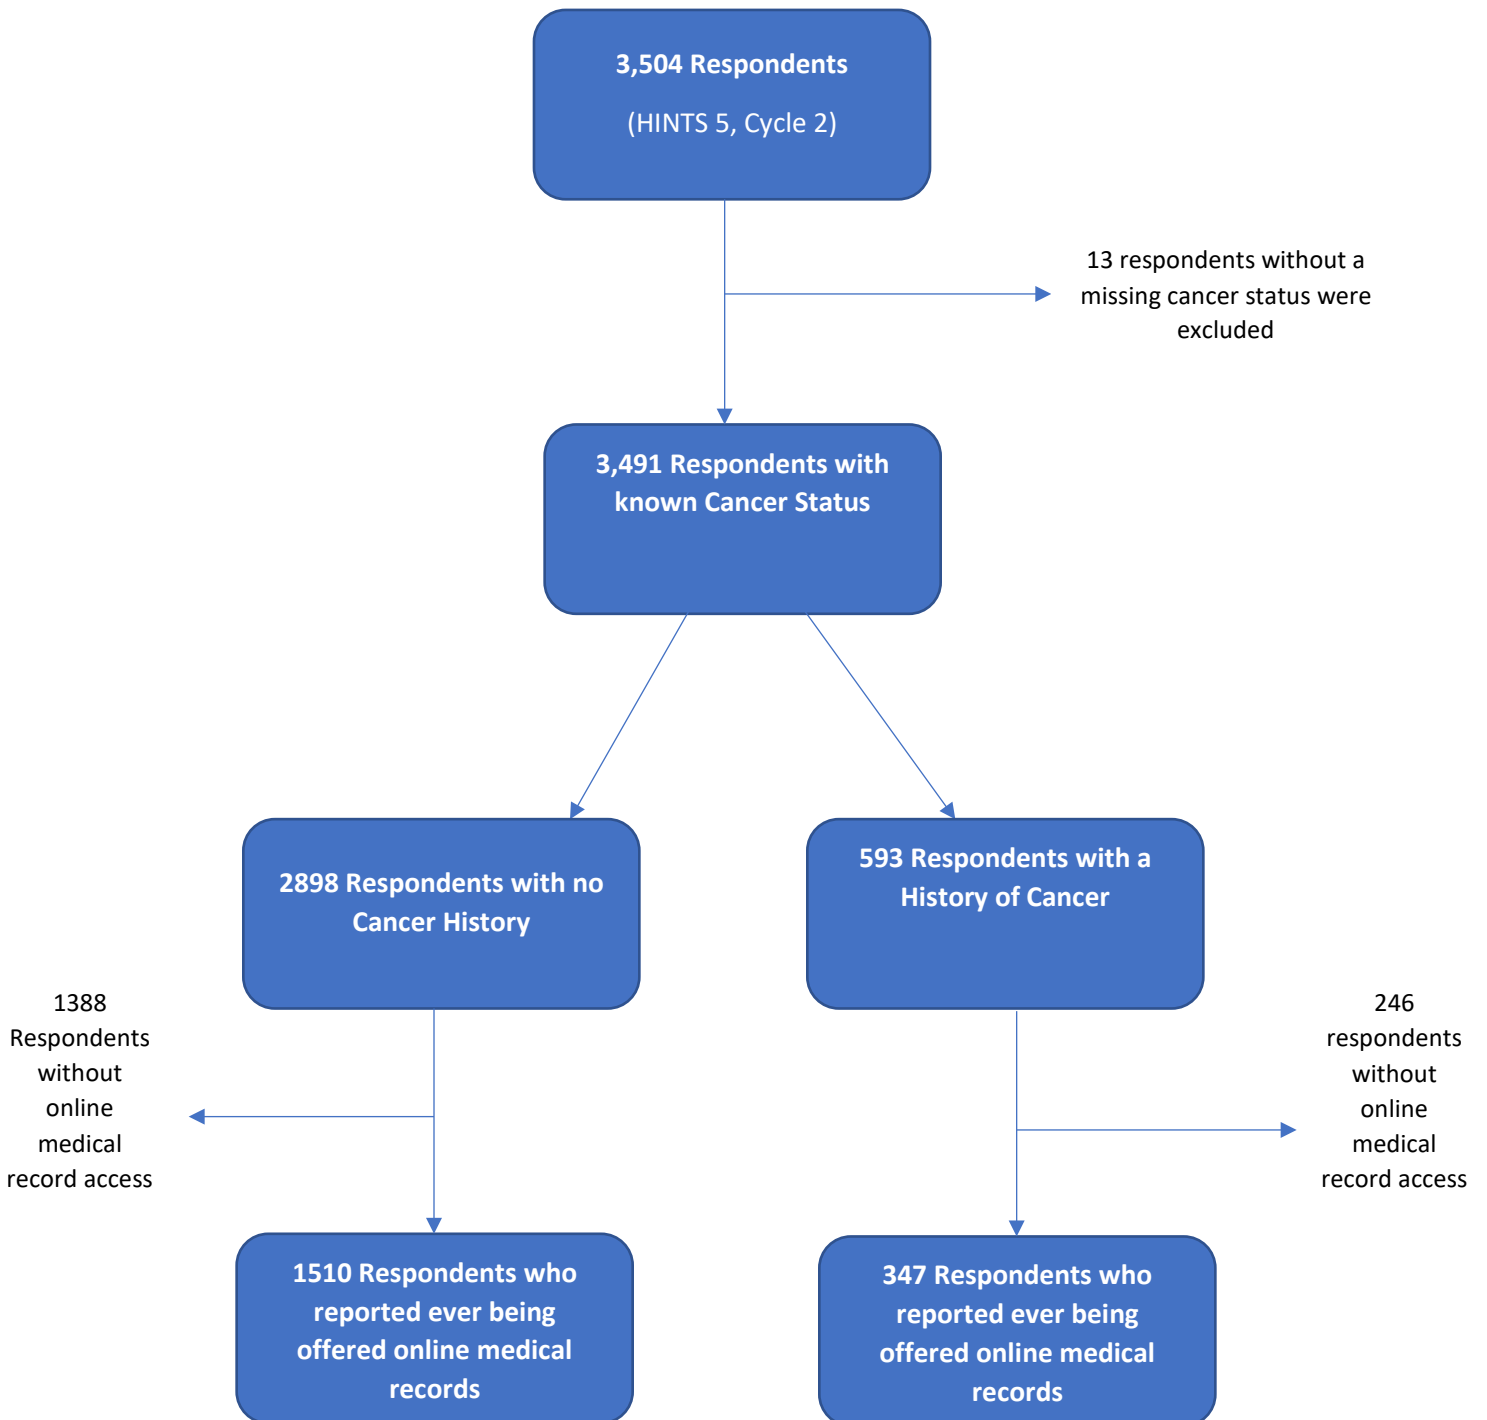

Supplement: NIHMS1619946-supplement-Supplemental_Data_File_1___doc___tif__pdf__etc__.pdf [file NIHMS1619946-supplement-Supplemental_Data_File_1___doc___tif__pdf__etc__.pdf]
